# Supplementary material for: Study of the correlation between the magnetic and electrical properties of the La 0.6 Sr 0.4 MnO 3 compound
Source: Royal Society of Chemistry journal article supplement (doi:10.1039/d4ra03528c), 2024-01-01
Supplement: d4ra03528c1.pdf [file d4ra03528c1.pdf]

This version of the ESI published 11 July 2024 replaces the original version published 8 July 2024 as the references in Table S2 were incorrect.

Electronic Supplementary Material (ESI) for RSC Advances

## Study of the correlation between magnetic and electrical properties of the $\text{La}_{0.6}\text{Sr}_{0.4}\text{MnO}_3$ compound

H. Gharsallah <sup>a,b</sup>, M. Jeddi <sup>a</sup>, M. Bejar <sup>a,c,\*</sup>, E. Dhahri <sup>a</sup>, S. Nouari <sup>d</sup>

<sup>a</sup> Laboratoire de Physique Appliquée, Faculté des Sciences, B.P. 1171, 3000 Sfax, Université de Sfax, Tunisie.

<sup>b</sup> Institut Préparatoire aux Études d'Ingénieur de Sfax, BP 1172-3018 Sfax, Université de Sfax, Tunisie.

<sup>c</sup> Faculté des Sciences de Monastir, Avenue de l'environnement 5019 Monastir, Université de Monastir, Tunisie.

<sup>d</sup> Department of mechanical engineering, King Fahd University of Petroleum and Minerals, Dhahran, Saudi Arabia.

### Contents

[Table S1](#): Refined structural parameters for  $\text{La}_{0.6}\text{Sr}_{0.4}\text{MnO}_3$  (S1C0).

[Table S2](#): Comparison of the magneto transport properties of  $\text{La}_{0.6}\text{Sr}_{0.4}\text{MnO}_3$  (S1C0) with other materials.

[Fig. S1](#): The temperature dependence of the inverse of the magnetic susceptibility.

[Fig. S2](#): The variations according to the temperature of the magnetization  $M(T)$  and the electrical resistance  $R(T)$  under different applied magnetic fields.

[Fig. S3](#) : Fit of the temperature dependence of resistance, at low temperatures, with the

three models: **(a)** the (ZDE) polynomial  $R(T) = R_0 + R_2T^2 + R_{4.5}T^{4.5}$  model with (e-m)

interactions, **(b)** the (ZDE) polynomial  $R(T) = R_0 + R_2T^2 + R_5T^5$  model with (e-ph)

scattering, and **(c)** the (SPCM) 
$$R(T) = R_0 + \frac{R_2}{\sinh^2\left(\frac{T_2}{T}\right)} + R_nT^n$$
 model.

This version of the ESI published 11 July 2024 replaces the original version published 8 July 2024 as the references in Table S2 were incorrect.

**Fig. S4:** Fit of the temperature dependence of resistance  $R(T)$ , at high temperatures, with the four transport models: **(a)** The (TAH), **(b)** the adiabatic (SPH), **(c)** the non-adiabatic (SPH) and **(d)** the (VRH).

**Table S1:** Refined structural parameters for  $La_{0.6}Sr_{0.4}MnO_3$  (S1C0).

|                                                               |                                                                                                |
|---------------------------------------------------------------|------------------------------------------------------------------------------------------------|
| <b>Space group</b>                                            | <i>P bnm</i> <b>100.00 (1.72)</b><br>$a \neq b \neq c$<br>$\alpha = \beta = \gamma = 90^\circ$ |
| <i>a</i> (Å)                                                  | 5.502 <sub>5</sub>                                                                             |
| <i>b</i> (Å)                                                  | 5.457 <sub>3</sub>                                                                             |
| <i>c</i> (Å)                                                  | 7.727 <sub>4</sub>                                                                             |
| <i>La, Ca, Sr sites</i> ( <i>x, y, z</i> )<br><i>Mult</i> = 4 | 0.997 <sub>7</sub><br>0.018 <sub>8</sub><br>0.25                                               |
| <i>Mn site</i> ( <i>x, y, z</i> )<br><i>Mult</i> = 4          | 0.50<br>0.00<br>0.00                                                                           |
| <i>O<sub>1</sub></i> ( <i>x, y, z</i> )<br><i>Mult</i> = 4    | 0.075 <sub>7</sub><br>0.513 <sub>5</sub><br>0.25                                               |
| <i>O<sub>2</sub></i> ( <i>x, y, z</i> )<br><i>Mult</i> = 8    | <i>Mult</i> = 8<br>0.711 <sub>4</sub><br>0.289 <sub>0</sub><br>0.015 <sub>6</sub>              |
| <i>V</i> (Å <sup>3</sup> )                                    | 58.012                                                                                         |
| <i>Mn-O<sub>1</sub>-Mn</i> (°)                                | 155                                                                                            |
| <i>Mn-O<sub>2</sub>-Mn</i> (°)                                | 161                                                                                            |
| <i>d<sub>Mn-O<sub>1</sub></sub></i> (Å)                       | 1.97 <sub>7</sub>                                                                              |
| <i>d<sub>Mn-O<sub>2</sub></sub></i> (Å)                       | 1.96 <sub>3</sub>                                                                              |
| $\langle d_{Mn-O} \rangle$ (Å)                                | 1.96 <sub>7</sub>                                                                              |
| $\sigma^2 \langle Mn-O \rangle$                               | $6.5546 \times 10^{-5}$                                                                        |
| <i>R<sub>F</sub></i> (%)                                      | 3.90                                                                                           |
| <i>R<sub>B</sub></i> (%)                                      | 2.69                                                                                           |
| <i>R<sub>p</sub></i> (%)                                      | 13.5                                                                                           |
| <i>R<sub>wp</sub></i> (%)                                     | 9.95                                                                                           |
| <i>R<sub>exp</sub></i> (%)                                    | 6.12                                                                                           |
| $\chi^2$ (%)                                                  | 2.64                                                                                           |

This version of the ESI published 11 July 2024 replaces the original version published 8 July 2024 as the references in Table S2 were incorrect.

**Table S2:** Comparison of the magneto transport properties of  $\text{La}_{0.6}\text{Sr}_{0.4}\text{MnO}_3$  (S1C0) with other materials.

| <b>Compound</b>                                                              | $\mu_0 H$ (T) | $T_R$ (K) | $MR_{max}$ (%) | $ TCR(\%) _{max}$ | <b>References</b> |
|------------------------------------------------------------------------------|---------------|-----------|----------------|-------------------|-------------------|
| $\text{La}_{0.6}\text{Sr}_{0.4}\text{MnO}_3$                                 | 2             | 222       | 20.1           | 0.84              | This work         |
| $\text{Nd}_{0.6}\text{Sr}_{0.3}\text{K}_{0.1}\text{MnO}_3$                   |               | 221       | 39             | 1.3               | [45]              |
| $\text{La}_{0.7}\text{Ca}_{0.25}\text{Sr}_{0.05}\text{MnO}_3$                | 0.1           | 259       | 15.4           |                   | [47]              |
| $\text{La}_{0.7}\text{Ca}_{0.15}\text{Sr}_{0.15}\text{MnO}_3$                |               | 263       | 14.2           |                   | [47]              |
| $\text{La}_{0.7}\text{Ca}_{0.1}\text{Sr}_{0.2}\text{MnO}_3$                  |               | 269       | 18.1           |                   | [47]              |
| $\text{La}_{0.7}\text{Ca}_{0.3}\text{MnO}_3$                                 | 1             | 172       | 25             |                   | [48]              |
| $\text{La}_{0.7}\text{Ca}_{0.2}\text{Ag}_{0.1}\text{MnO}_3$                  |               | 200       | 30             |                   | [48]              |
| $\text{La}_{0.7}\text{Ca}_{0.1}\text{Ag}_{0.2}\text{MnO}_3$                  |               | 296       | 20.8           |                   | [48]              |
| $\text{La}_{0.7}\text{Ag}_{0.3}\text{MnO}_3$                                 |               | 303       | 17.1           |                   | [48]              |
| $\text{La}_{0.75}\text{Sr}_{0.25}\text{Mn}_{0.75}\text{Cr}_{0.25}\text{O}_3$ | 2             | 228       | 62             |                   | [46]              |
| $\text{La}_{0.6}\text{Sr}_{0.25}\text{K}_{0.15}\text{MnO}_3$                 |               | 287       | 45             |                   | [52]              |
| $\text{La}_{0.6}\text{Ca}_{0.4}\text{MnO}_3$                                 |               | 220       | 45             | 1.3               | [53]              |
| $\text{La}_{0.5}\text{Ag}_{0.1}\text{Ca}_{0.4}\text{MnO}_3$                  |               | 380       |                | 2.1               | [54]              |
| $\text{La}_{0.6}\text{Eu}_{0.1}\text{Sr}_{0.3}\text{MnO}_3$                  |               | 360       |                | 1.1               | [55]              |

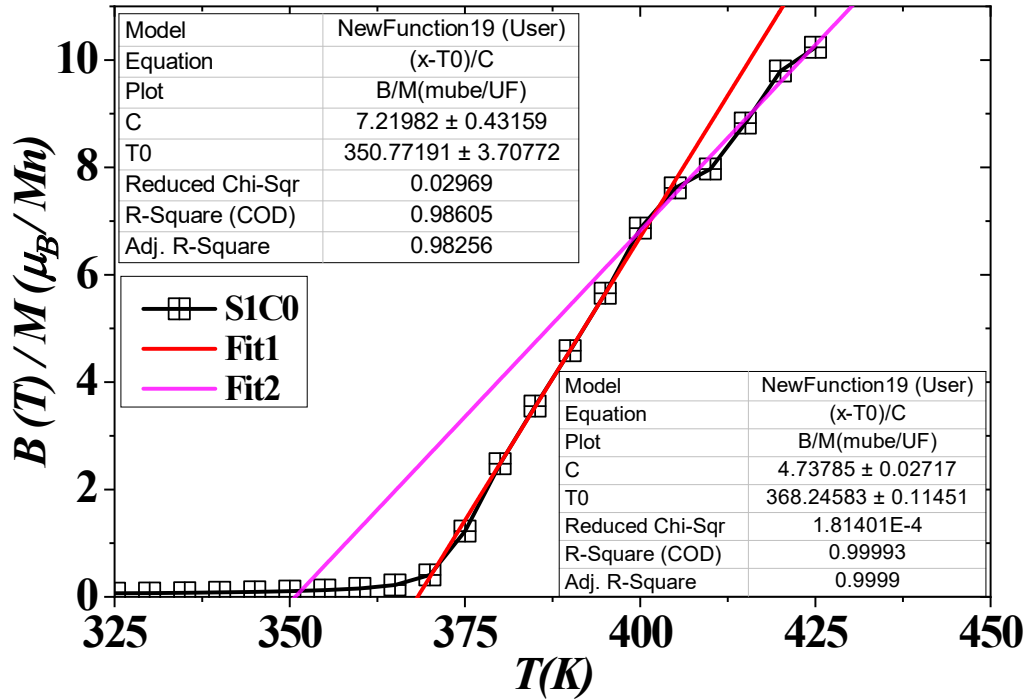

**Fig. S1:** The temperature dependence of the inverse of the magnetic susceptibility. The  $\chi^{-1}(T)$  curve presents two linear branches. The first one is fitted with the Curie-Weiss law [31], indicating the PM-FM transition at  $\theta_{WC} = 368 K$  value quite equal to the Curie temperature  $T_c \approx 365 K$ . The second branch, shows the existence of another temperature characteristic of the magnetic properties  $T_i \approx 350 K$ , indicating the existence of (*SPM*) clusters within the (*FM*) phase in the temperature interval between  $T_B$  and  $T_c$ . So, the irreversibility temperature  $T_i$  can be defined as the temperature of a *SPM/PM* transition.

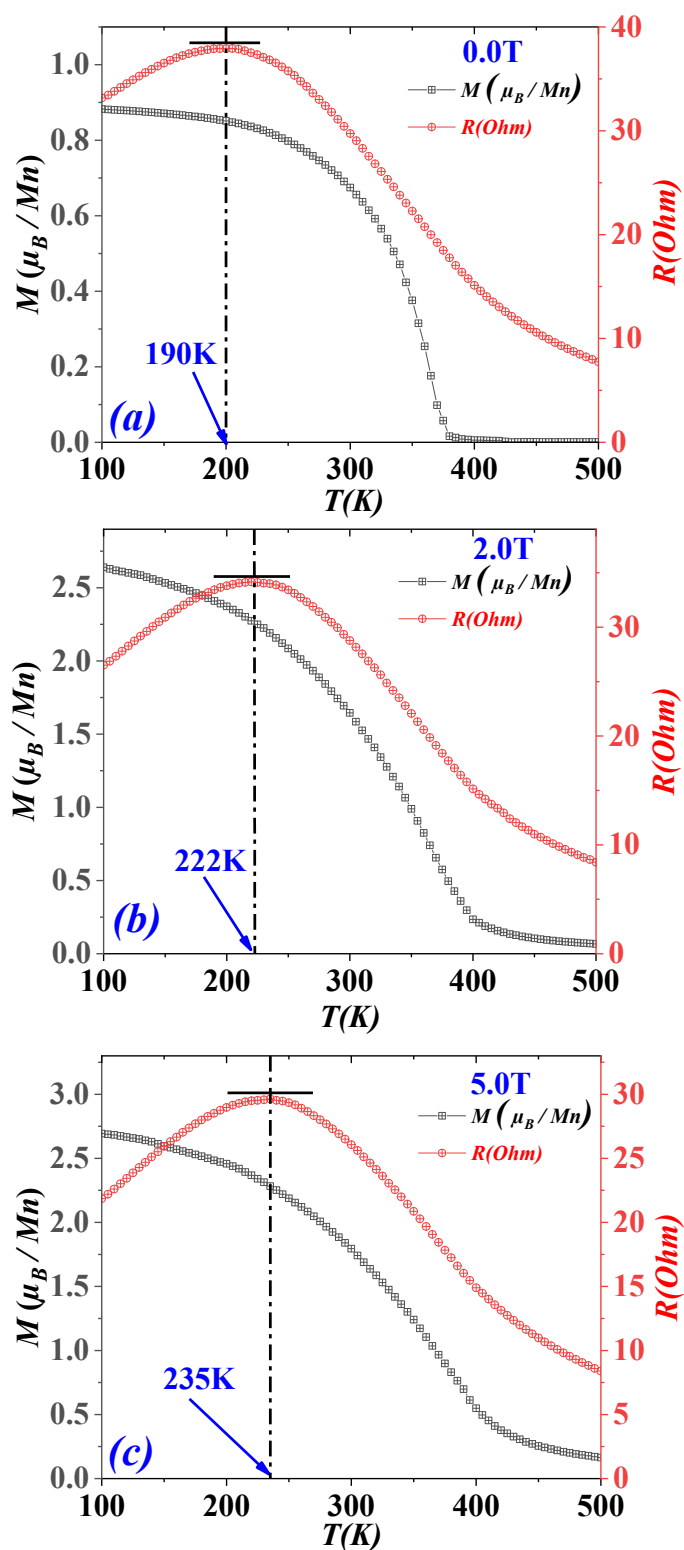

**Figs. S2 (a), (b) and (c)** the variations according to the temperature of the magnetization  $M(T)$  and the electrical resistance  $R(T)$  of (S1C0) under different applied magnetic fields of 0, 2 and 5 T, respectively.

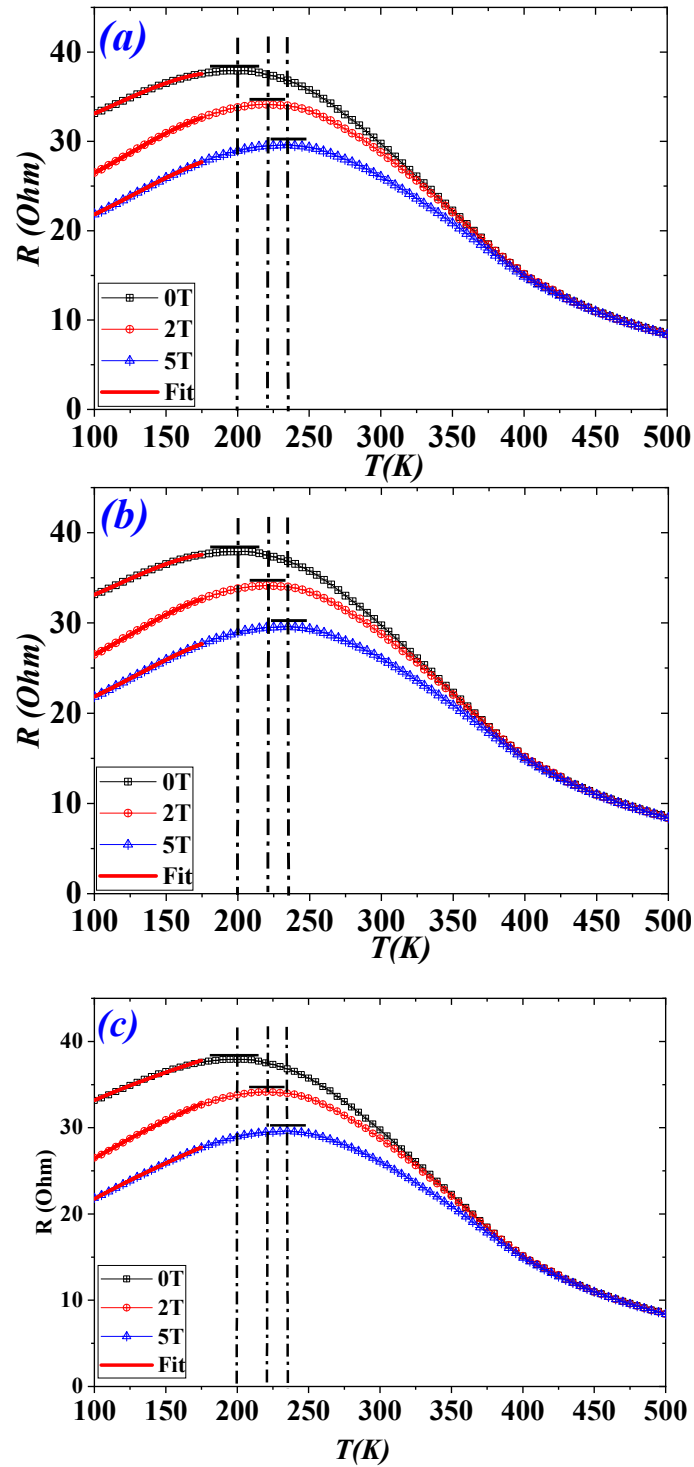

**Figs. S3 :** (a), (b) and (c) Fit of the temperature dependence of resistance, at low temperatures, under different applied magnetic fields of 0, 2 and 5 T, with the three models: (a) the (ZDE) polynomial  $R(T) = R_0 + R_2T^2 + R_{4.5}T^{4.5}$  model with (e-m)

interactions, **(b)** the (ZDE) polynomial  $R(T) = R_0 + R_2T^2 + R_5T^5$  model with (e-ph)

$$R(T) = R_0 + \frac{R_2}{\sinh^2\left(\frac{T_2}{T}\right)} + R_nT^n$$

scattering, and **(c)** the (SPCM)

model.

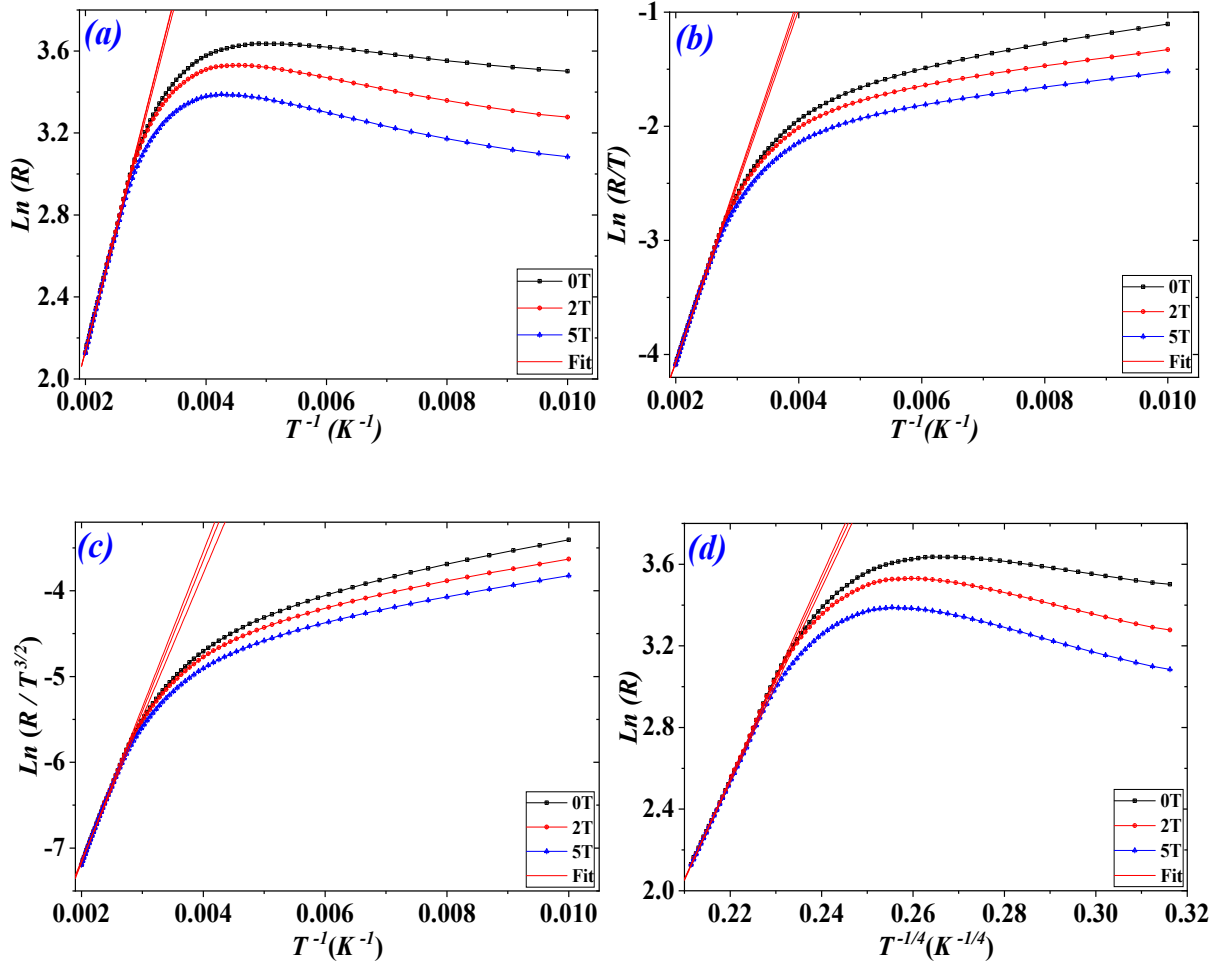

**Fig. S4:** Fit of the temperature dependence of resistance  $R(T)$ , at high temperatures, under different applied magnetic fields of 0, 2 and 5 T, with the four transport models: **(a)** The (TAH), **(b)** the adiabatic (SPH), **(c)** the non-adiabatic (SPH) and **(d)** the (VRH).
